# Supplementary material
Source: PubMed Central journal article supplement (PMC5479637)
Supplement: NIHMS868766-supplement.pdf [file NIHMS868766-supplement.pdf]

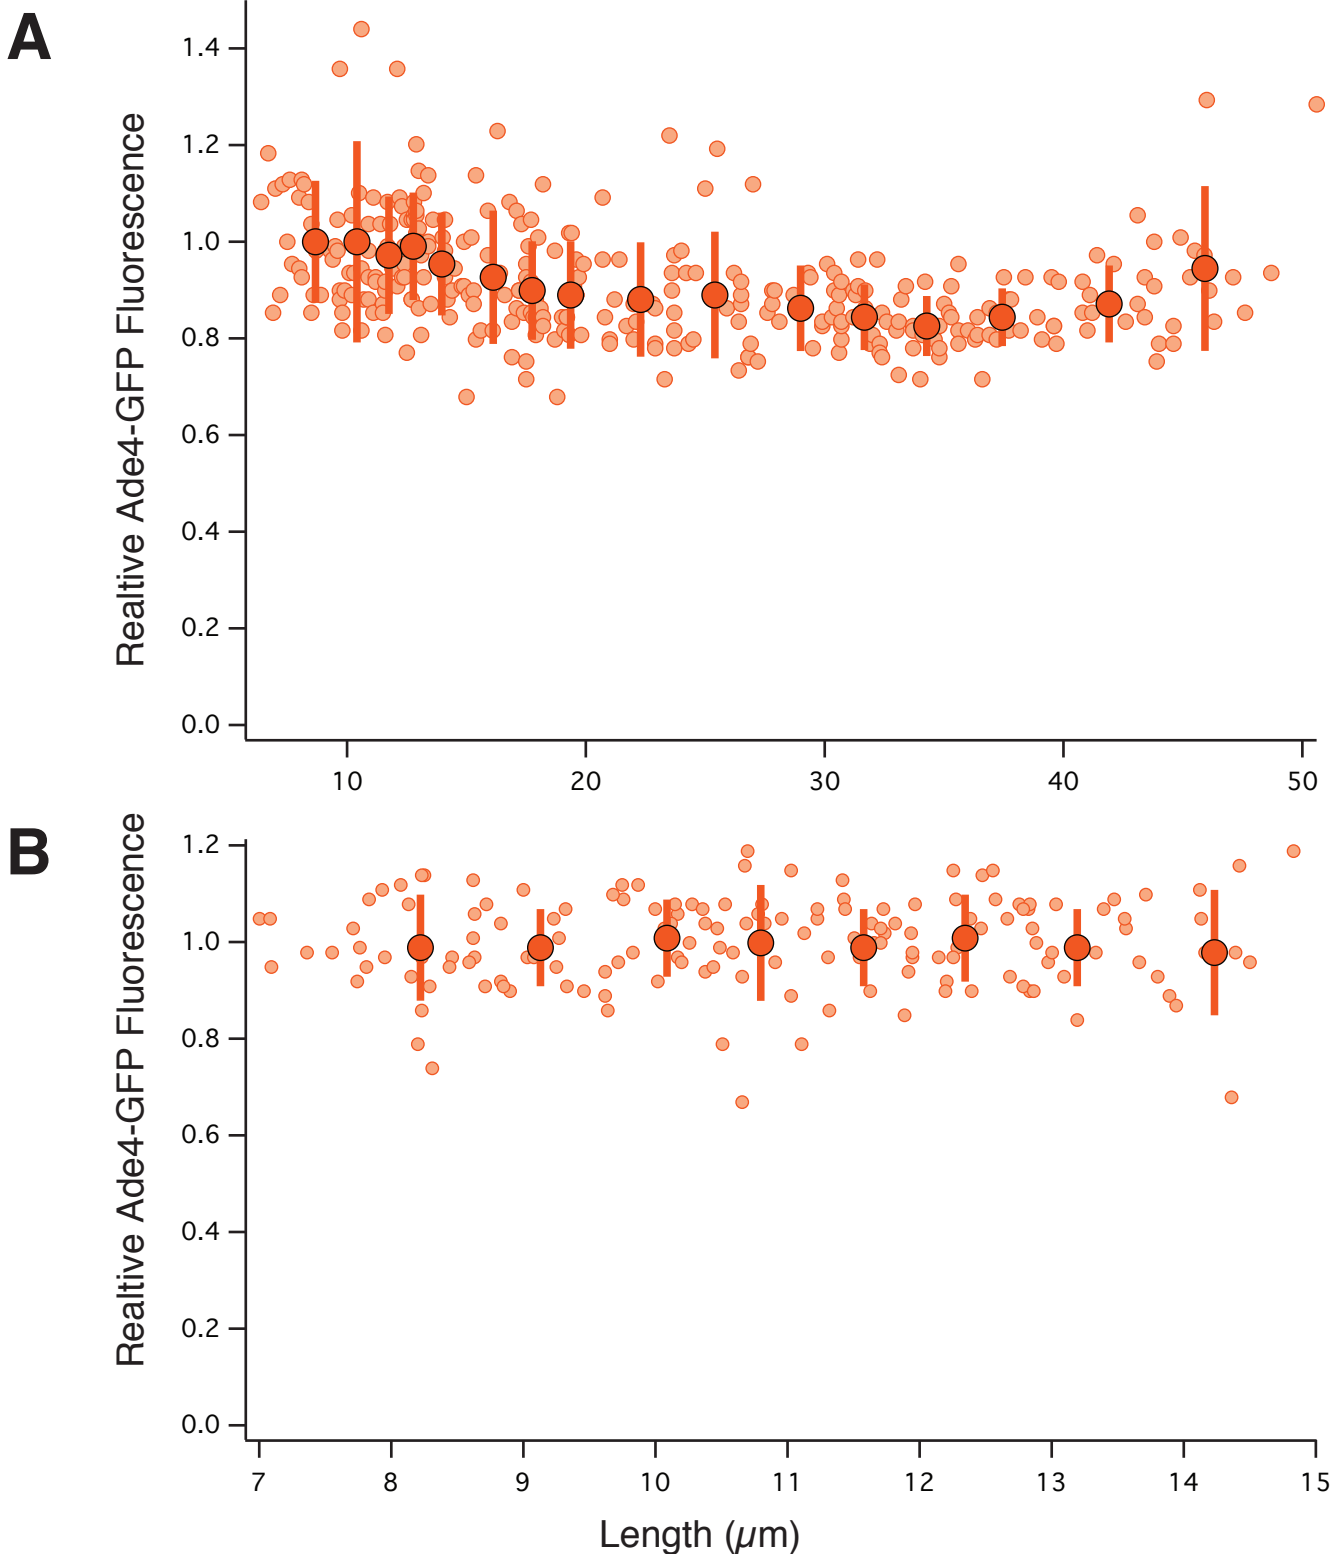

**Figure S1. Related to Figure 1:**

**Ade4 maintains a constant concentration, independent of size or cell cycle.**

(A) *cdc2-ts* cells expressing Ade4-GFP (yFS982) were shifted to the restrictive temperature of 35°C and sampled at 0, 2, 4 and 6 hours. Ade4-GFP signal and cell length were measured microscopically in individual cells. The concentration of Ade4 was calculated as the mean cellular fluorescence. The mean signals from 25-cell bins are shown in large opaque symbols with error bars depicting standard deviation.

(B) The same cells (yFS982) were grown at the permissive temperature of 25°C. Cells were imaged and analyzed in (A). The lack of change in the Ade4-GFP signal as cells grow from 7 to 15  $\mu\text{m}$  shows that Ade4 expression does not vary with cell-cycle progression.

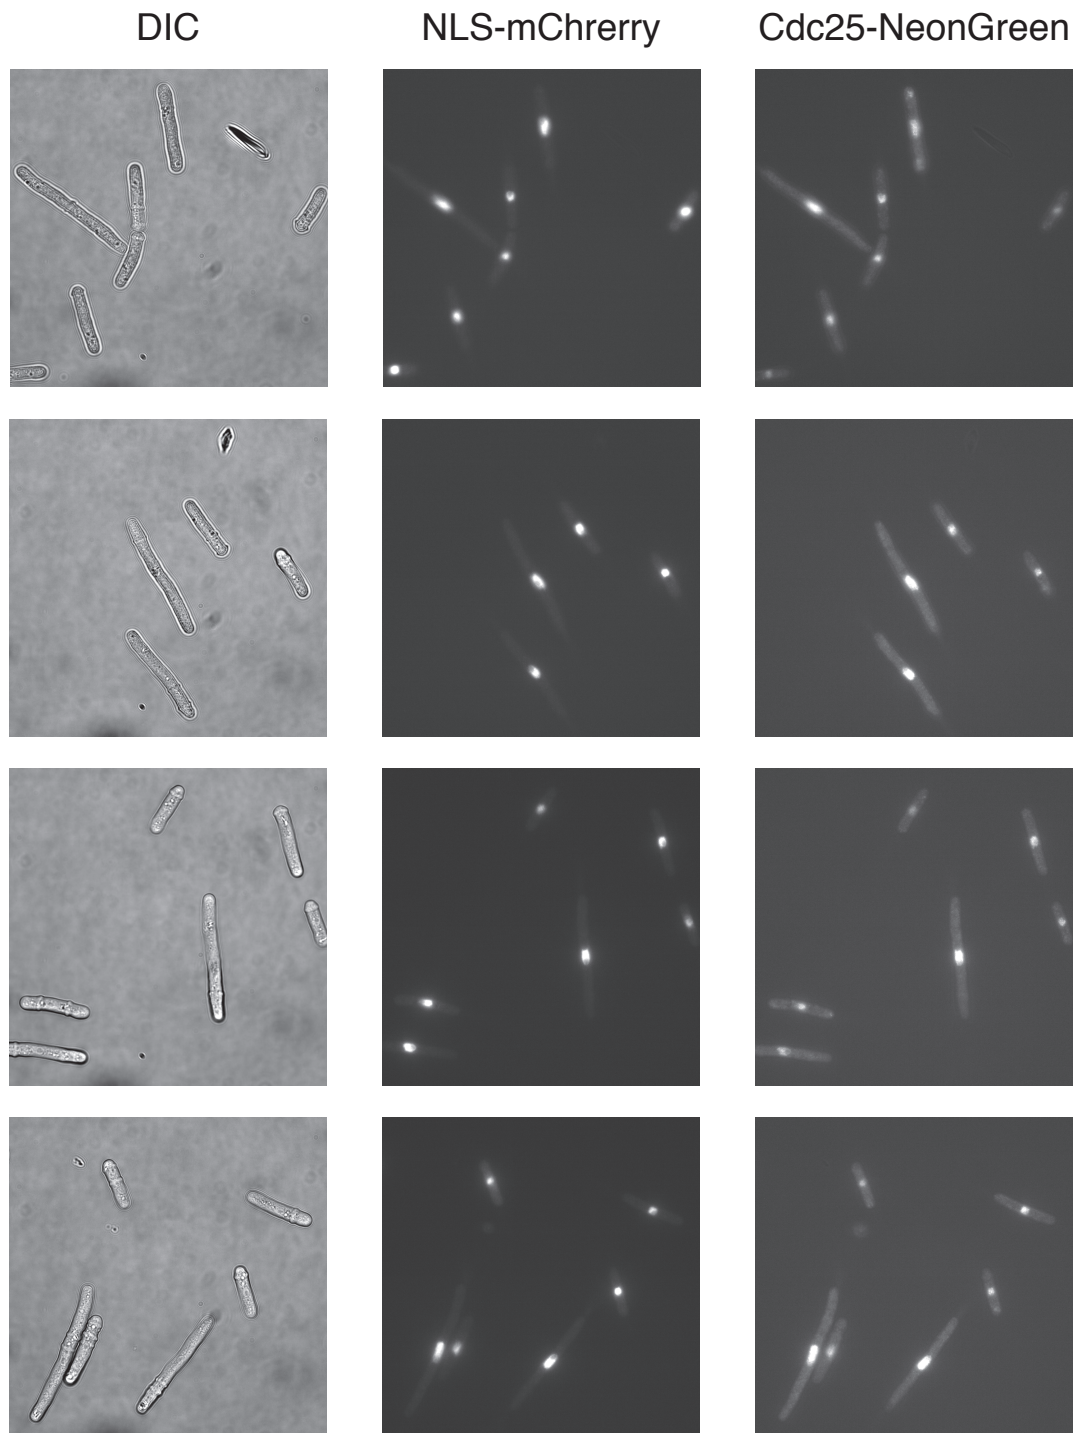

**Figure S2. Related to Figure 1:**

**Images of fluorescent cells quantitated in Figure 1D.**

*cdc2-ts* cells expressing Cdc25-NeonGreen and GST-NLS-mCherry (yFS978) were shifted to the restrictive temperature of 35°C for 2, 4 or 6 hours, mixed and imaged by DIC and wide-field epifluorescence microscopy. To examine if nuclear localization changes with size, we measured the ratio of nuclear to cytoplasmic signal. There is only a modest difference between the ratio in the smallest 20% of cells ( $2.88 \pm 0.34$ ) and the largest 20% of cells ( $3.31 \pm 0.27$ ) suggesting that the degree of nuclear localization is largely size independent..

**A**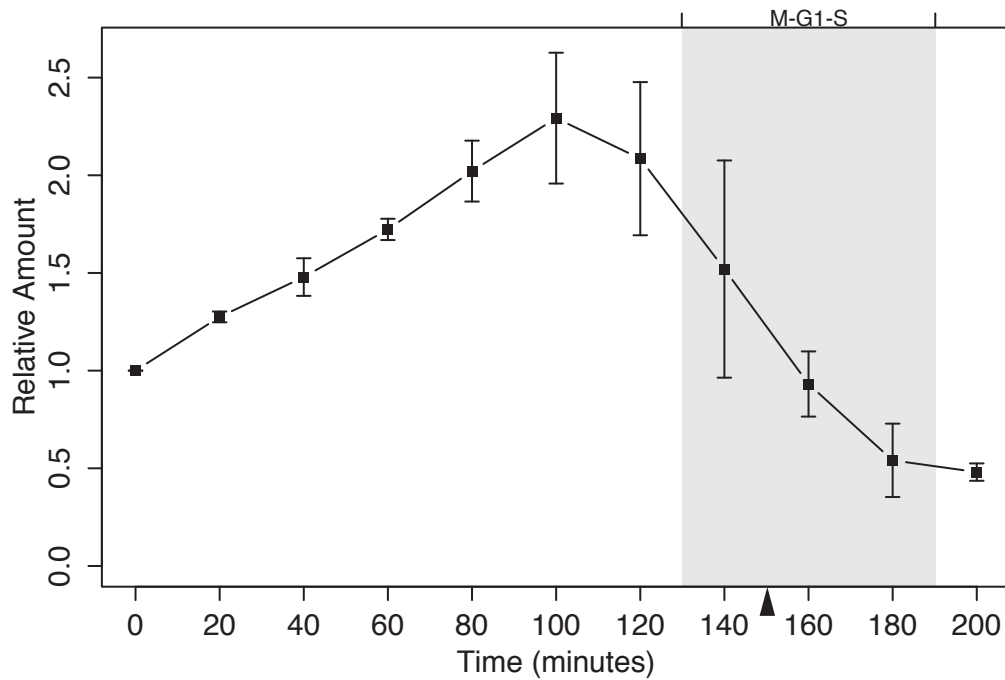**B**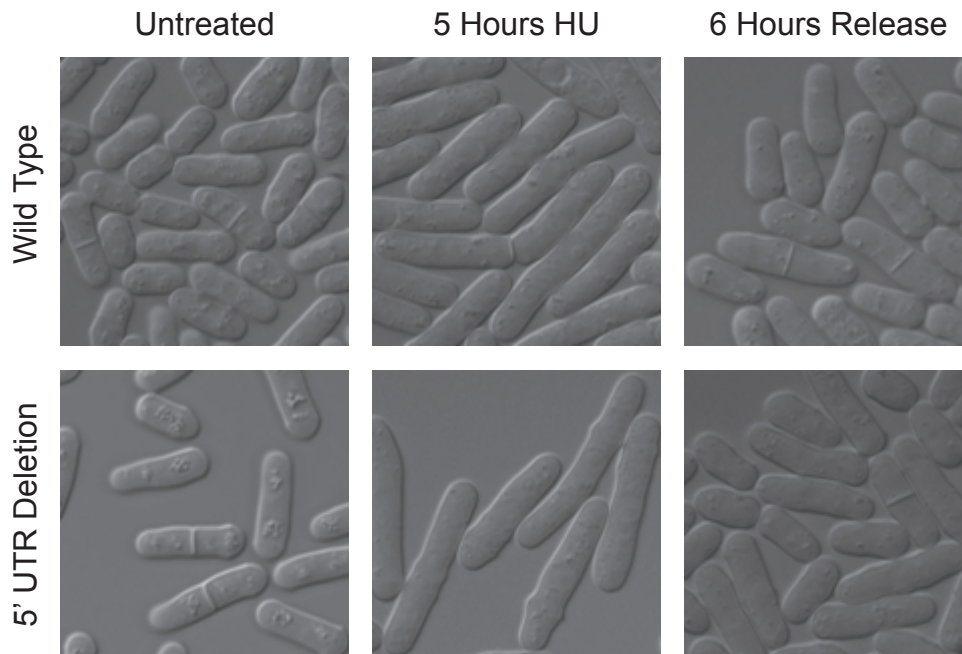

**Figure S3. Related to Figure 1:**

**Size-dependent expression of Cdc25 does not require its 5' UTR.**

(A). Cells deleted for the *cdc25* 5'-UTR and tagged with luciferase (yFS885) were analyzed as in Figure 1A.

(B). Wild-type (yFS105) and cells deleted for the *cdc25* 5'-UTR and tagged with luciferase (yFS885) were arrested for 5 hours in 10 mM HU and released for 6 hours. Both strains rapidly return to their normal cell size after G2 elongation, demonstrating size homeostasis.

**Table S1. Oligonucleotides used for PCR (Related to STAR Methods)**

|        |                                                                                                              |
|--------|--------------------------------------------------------------------------------------------------------------|
| DK6    | TTGGCCAAAGTGTGTTAGCTTCCCCAGACGTTAATGATTCTCCTACTGCCATGCATTCCCTCTCTACAC<br>TTAGAAGATTTTCGGATCCCCGGGTTAATTAA    |
| DK7    | AGAAAAAAGTGGTTAGAAAAGTTGAATATATAAGAGTATACTTCAGGCTAGGTAAAGTATTGAGT<br>CAGCCTAAAATCAGAATTCGAGCTCGTTTAAAC       |
| DK26   | TTGCAGAAGATGAGGAACGTGAAGCTCCCGAAGACATTTCTCTCCATAACACACATTCAGATGTTACT<br>TTTGATTTTGTTCGGATCCCCGGGTTAATTAA     |
| DK27   | GATTAGAGCATCAATCTAGACAAAGTAAATGGAGGATTGGTTATTATAATAAAGCACTAAGCATTGA<br>ATAAATTGGGGAAGAATTCGAGCTCGTTTAAAC     |
| NR186  | CCATAATTTATGAAGGTATTCATGGATCTTCTTCTAACCCCCAGGGTGATCAAATGATGGAAGATTGG<br>CAGGTGAATGTTTCGGATCCCCGGGTTAATTAA    |
| NR187  | GCTAAACAGATTTTGGAAAGCCATTCCCTTATTTGCAATTCGCGAGTAATAAACATTGAGAACAAGAG<br>TCTCTAAAAGGTGAATTCGAGCTCGTTTAAAC     |
| MM6    | AGAAAAAAGTGGTTAGAAAAGTTGAATATATAAGAGTATACTTCAGGCTAGGTAAAGTATTGAGT<br>CAGCCTAAAATCACGCACTTAACCTTCGCATCTG      |
| MM41   | TTGGCCAAAGTGTGTTAGCTTCCCCAGACGTTAATGATTCTCCTACTGCCATGCATTCCCTCTCTACAC<br>TTAGAAGATTTTCGGATCCCCGGGTTAATTAACAT |
| MO294  | GATTAGAGCATCAATCTAGACAAAGTAAATGGAGGATTGGTTATTATAATAAAGCACTAAGCATTGA<br>ATAAATTGGGGAATTATTCTTTGCCCTCGGACGAGT  |
| MO296  | TTGCAGAAGATGAGGAACGTGAAGCTCCCGAAGACATTTCTCTCCATAACACACATTCAGATGTTACT<br>TTTGATTTTGTAGTAAAGGAGAAGAACTTTTCACTG |
| cdc25f | ATGACCTGCACCAAGGCTAT                                                                                         |
| cdc25r | TCATTAACGTCTGGGGAAGC                                                                                         |
| wee1f  | GATGAGGTTTGTGGGTTGA                                                                                          |
| wee1r  | CATTCACCTGCCAATCTTCC                                                                                         |
| srp7f  | GTGCATGTTTCGGTGGTCTCG                                                                                        |
| srp7r  | AAGACCCGGTAGTGATGTGC                                                                                         |

**Table S2. Oligonucleotides used for FISH (Related to STAR Methods)**

|                                           |                                                                                                                                                                                                                                                                                                                                                                                                                                                                                                                                                                                                                                                                                                                                                                                                                                                                                                                                                                                                                                                                                                       |
|-------------------------------------------|-------------------------------------------------------------------------------------------------------------------------------------------------------------------------------------------------------------------------------------------------------------------------------------------------------------------------------------------------------------------------------------------------------------------------------------------------------------------------------------------------------------------------------------------------------------------------------------------------------------------------------------------------------------------------------------------------------------------------------------------------------------------------------------------------------------------------------------------------------------------------------------------------------------------------------------------------------------------------------------------------------------------------------------------------------------------------------------------------------|
| <p>rpb1<br/>FISH<br/>Probe<br/>Array</p>  | <p>gtgaaaactgaatcccgctc,cttcgcaacgctcattgaac,tattggcggaggaggattacta,gcatactgctcattaagacc,ttccatc<br/>caccgaaatacta,attgtccatatacgtggcaa,ttttgtaaagcctgaggctg,tacttttaagaggctgcca,gatcaccggtaatc<br/>acagta,tggaacaccgagttcatcta,ctctcctgtatcacgaatga,cattttgtgaagggatggct,cgagtttcttctgactgagg,<br/>acaatctgcttaggtacat,attcattacagcgttgcgag,gcttatcgtcgtctctaatt,gtctctcgttgattgagaa,cgacgcaa<br/>gcagacatttga,tacgtttgccttcaacgatt,cacgagattctggagagtcg,ttgaggagttaaaccctta,gcagatcaatcaa<br/>accctc,aacaagacgcctttggatgt,aaccattacatcctccatag,actcctatcctccattaat,gttctcaatagagttctcca,g<br/>catcacctttggggaaaat,tcggtaaaagatcgggtgggt,ttccattattaccggtttta,accaaggtaacgttcttag,gaatttcg<br/>gttcagaggta,taagcttctgcatatcc,tacggatcatcatcgcaatg,ctctcaagcatatgaccttc,acgagtaatgttcgg<br/>cacac,gtaagatttatgccgtctgt,gtaaatgccatgacgggtaa,agcagcatccataaggattt,ccagaatcaaccattggtga,<br/>tggactagtataaccagggg,tgaagtaagtccataccag,ggaatatcccggagatgatg,tcgatggcatataagcaggt,tagg<br/>agggactagttggaga,aatatgatgggcttgtggga,agagggactagtcgggtgaat,gagggactagttggagagta,tagggga<br/>atacaggggactc</p> |
| <p>cdc25<br/>FISH<br/>Probe<br/>Array</p> | <p>gccagatagagtgttgtaa,cagcaggacgcaatacattc,ctcttgatttgcattgcgat,gtgtttggatttcgggaaga,gatcca<br/>ctaattgtgaggca,gctgtcgaacaagttttcc,cagcagctaaggaagatgca,gctttcatcgatagcatgt,aagagcgtacg<br/>acgaggagt,gagaggggtttctacagtac,tccgggagaggtgaaacaat,ctcggtaaagcgtcattcg,ggaatacttcgatgc<br/>aggtt,tagtgctggaaacacgtggg,tgctttaggcttaaagctgt,cgcttttggtggtttaa,acgttaggacgaaggttagga,g<br/>ttcctgatgatcgagaac,gaactcgatctggatcga,cagaagttcccttcttttg,taagtcaaatggcgggtagc,ctgacta<br/>caggtacgggata,caagtaagctggtcgtgttg,cttgccatcgtaaatgtat,agttcaacagagctttctgg,aatagaggcagc<br/>gtcttcaa,gcaccaaaatcactgttggg,gggacctaaacttcaagcta,tcttcttgcatagcgaatgc,gggtatcttctcatcat<br/>a,aacatgctttgggtacgac,ttgaaaagccctagtctgt,aacgcacacaagatcttggc,cactttctttggtcgattgt,cacgg<br/>cgaagcaaggaagag,attcgtttcaatgagtcctc,agaccgagcaatggttcttg,ccacaatagcttcttcgta,cccgatgagta<br/>agaggttga,gcgcactatggtcacaatga,agtgcaatgccaatgaggt,gactattcattcgtctgtcg,acgacttgaaccacca<br/>tga,ttgggtcacaacggttttg,atcgttcatcggaacgtagt,cttggtgcaggtcataacat,aacgtctggggaagctaaca,tgc<br/>atggcagtaggagaatc</p>            |
